# Supplementary material for: Single-Component Hydrophilic Terpolymer Thin Film Systems for Imparting Surface Chemical Versatility on Various Substrates
Source: MDPI journal article supplement (doi:10.3390/polym16010044), 2023-12-21
Supplement: s1 [file s1]

## Supplementary Material

# Single Component Hydrophilic Terpolymer Thin Film Systems for Imparting Surface Chemical Versatility on Various Substrates

*Yun Hee Ko,<sup>1</sup> Hai Ha Tran Nguyen,<sup>1,2</sup> Christopher R. Branstetter,<sup>3</sup> Soeun Park,<sup>1</sup> Jin-Kyun Lee,<sup>4,5</sup> Jaesung Yang,<sup>6,\*</sup> Jangwook P. Jung,<sup>3,\*</sup> and Myungwoong Kim<sup>1,\*</sup>*

<sup>1</sup>Department of Chemistry and Chemical Engineering, Inha University, Incheon 22212, Republic of Korea.

<sup>2</sup>Department of Applied Chemistry, Reutlingen University, Alteburgstraße 150, Reutlingen 72762, Germany.

<sup>3</sup>Department of Biological Engineering, Louisiana State University, Baton Rouge, Louisiana 70803, United States

<sup>4</sup>Program in Environment and Polymer Engineering, Inha University, Incheon 22212, Republic of Korea

<sup>5</sup>Department of Polymer Science and Engineering, Inha University, Incheon 22212, Republic of Korea

<sup>6</sup>Department of Chemistry, Yonsei University, Wonju, Gangwon 26493, Republic of Korea.

\*Corresponding authors: Myungwoong Kim (mkim233@inha.ac.kr); Jangwook P. Jung (jjung1@lsu.edu); Jaesung Yang (jaesung.yang@yonsei.ac.kr)



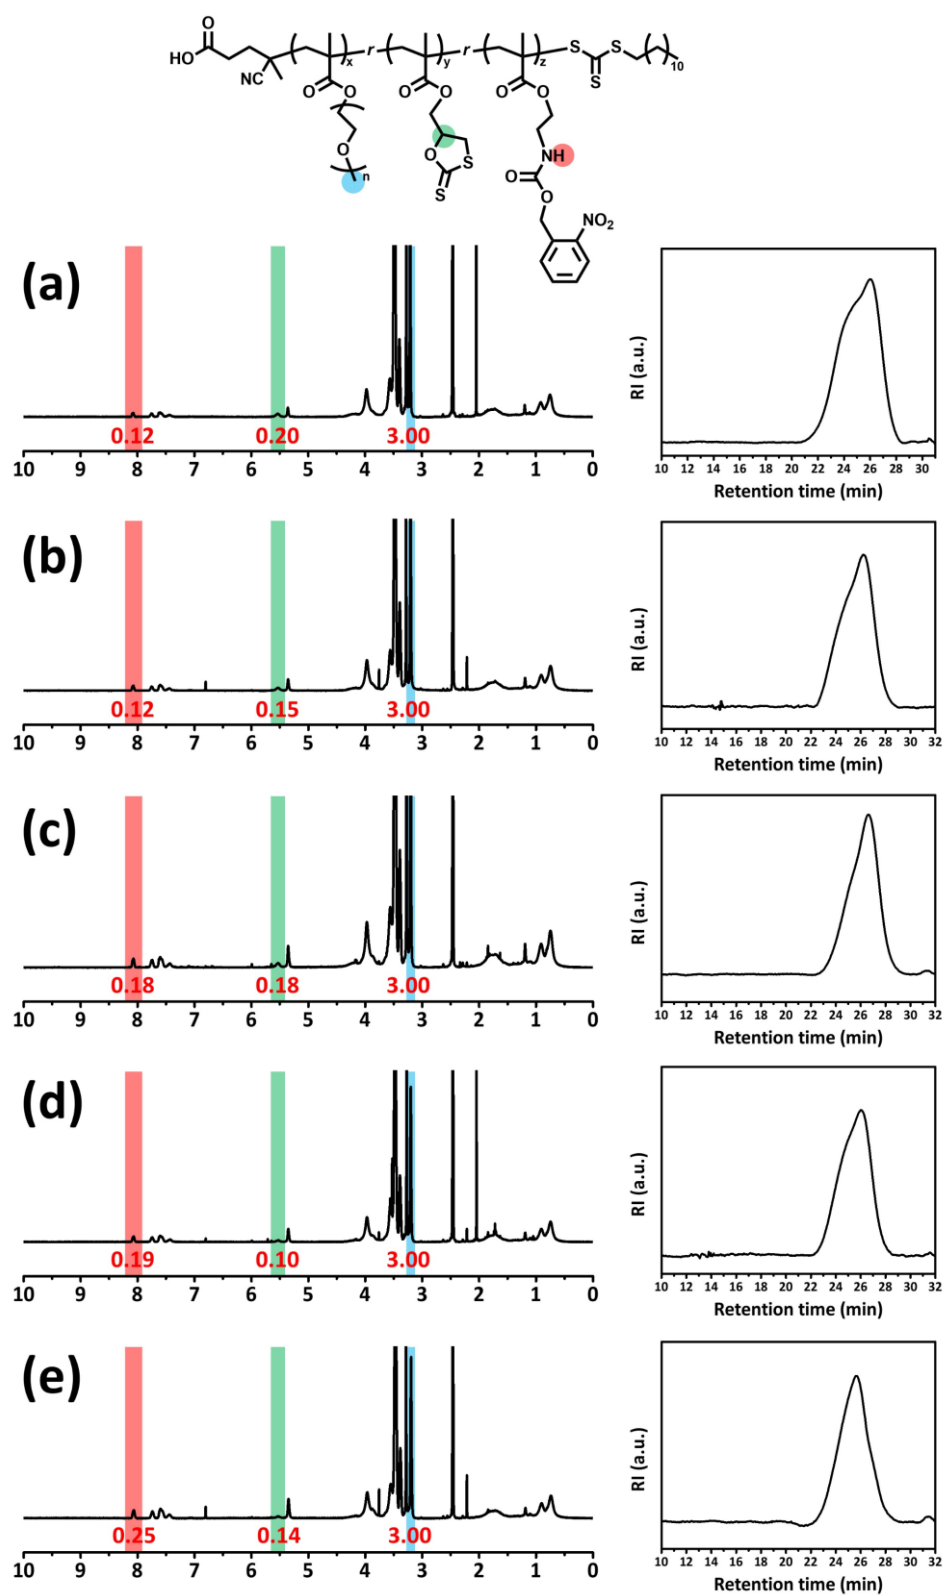

**Figure S2.**  $^1\text{H}$  NMR spectra and SEC traces of the synthesized (a) MDN1, (b) MDN2, (c) MDN3, (d) MDN4, and (e) MDN5 copolymers.

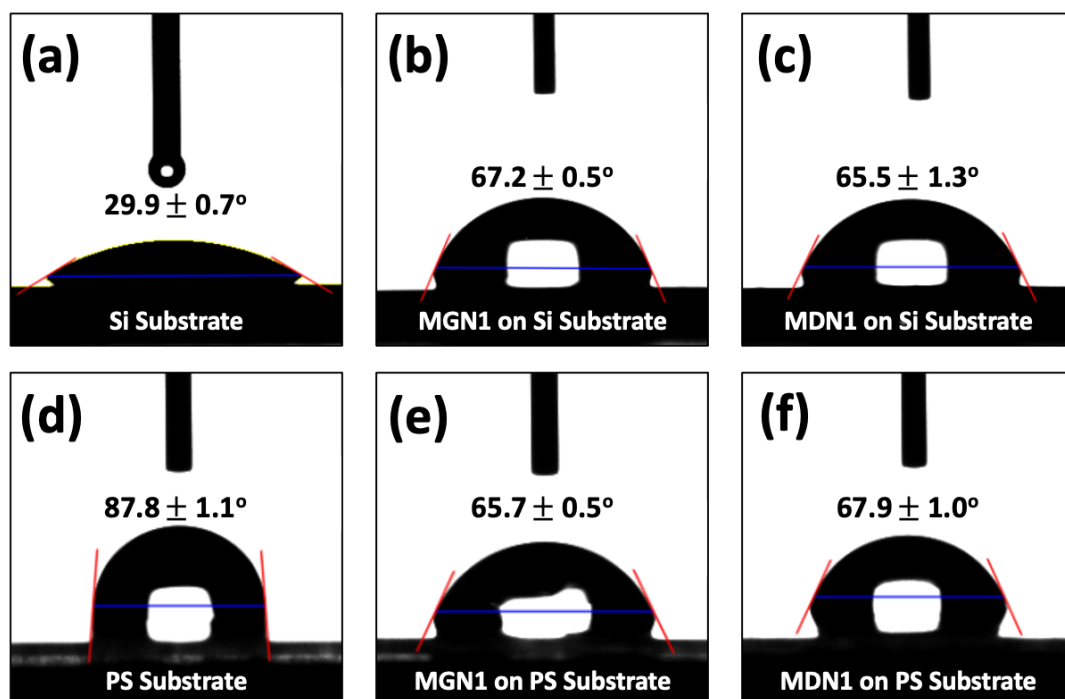

**Figure S3.** Representative optical images of water sessile drops on (a) bare silicon, (b) MGN1-coated on silicon, (c) MDN1-coated on silicon, (d) bare PS, (e) MGN1-coated on PS, and (f) MDN1-coated on PS substrates.

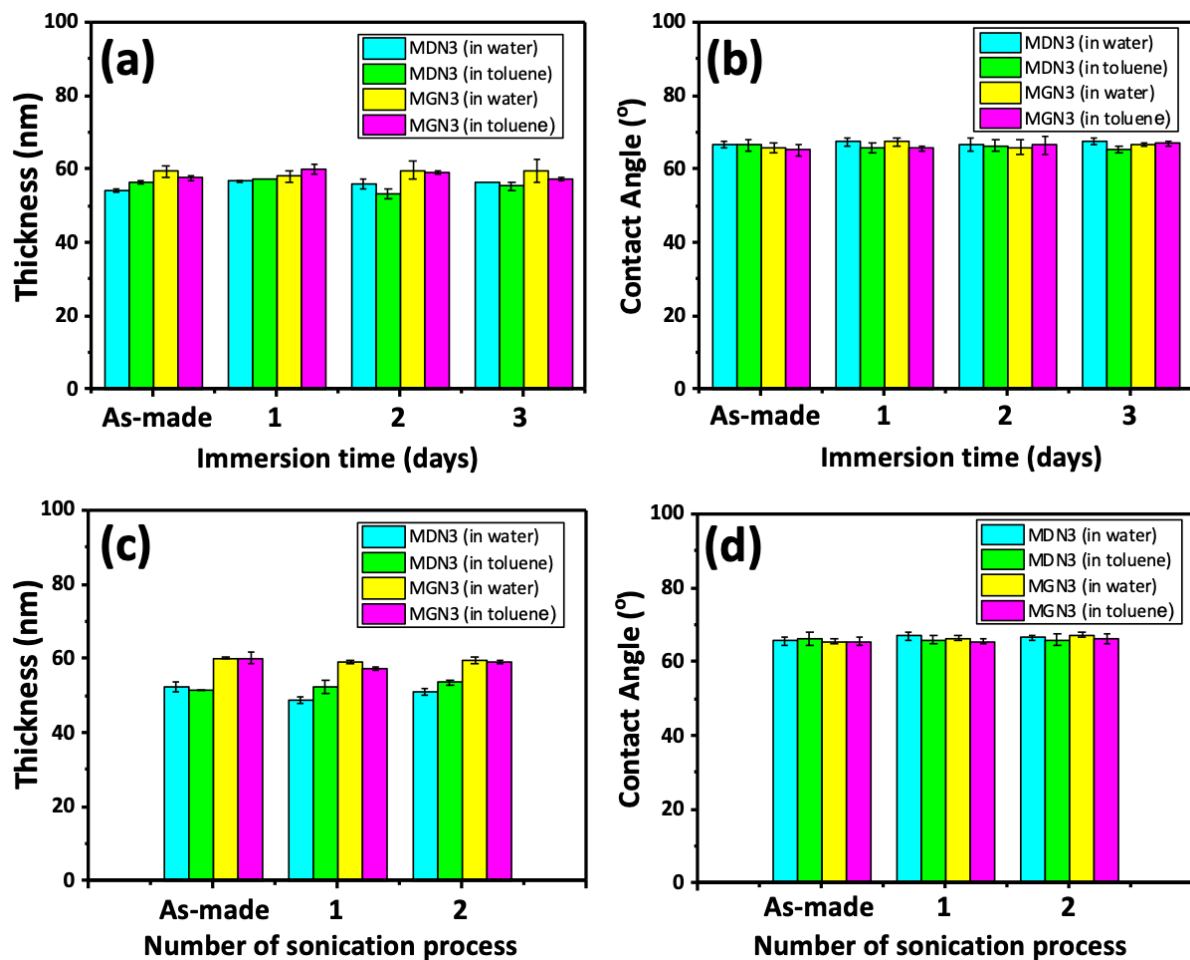

**Figure S4.** Thickness and water contact angle of MDN3 and MGN3 thin films (a and b) immersed in DI water or toluene and (c and d) sonicated in DI water or toluene.

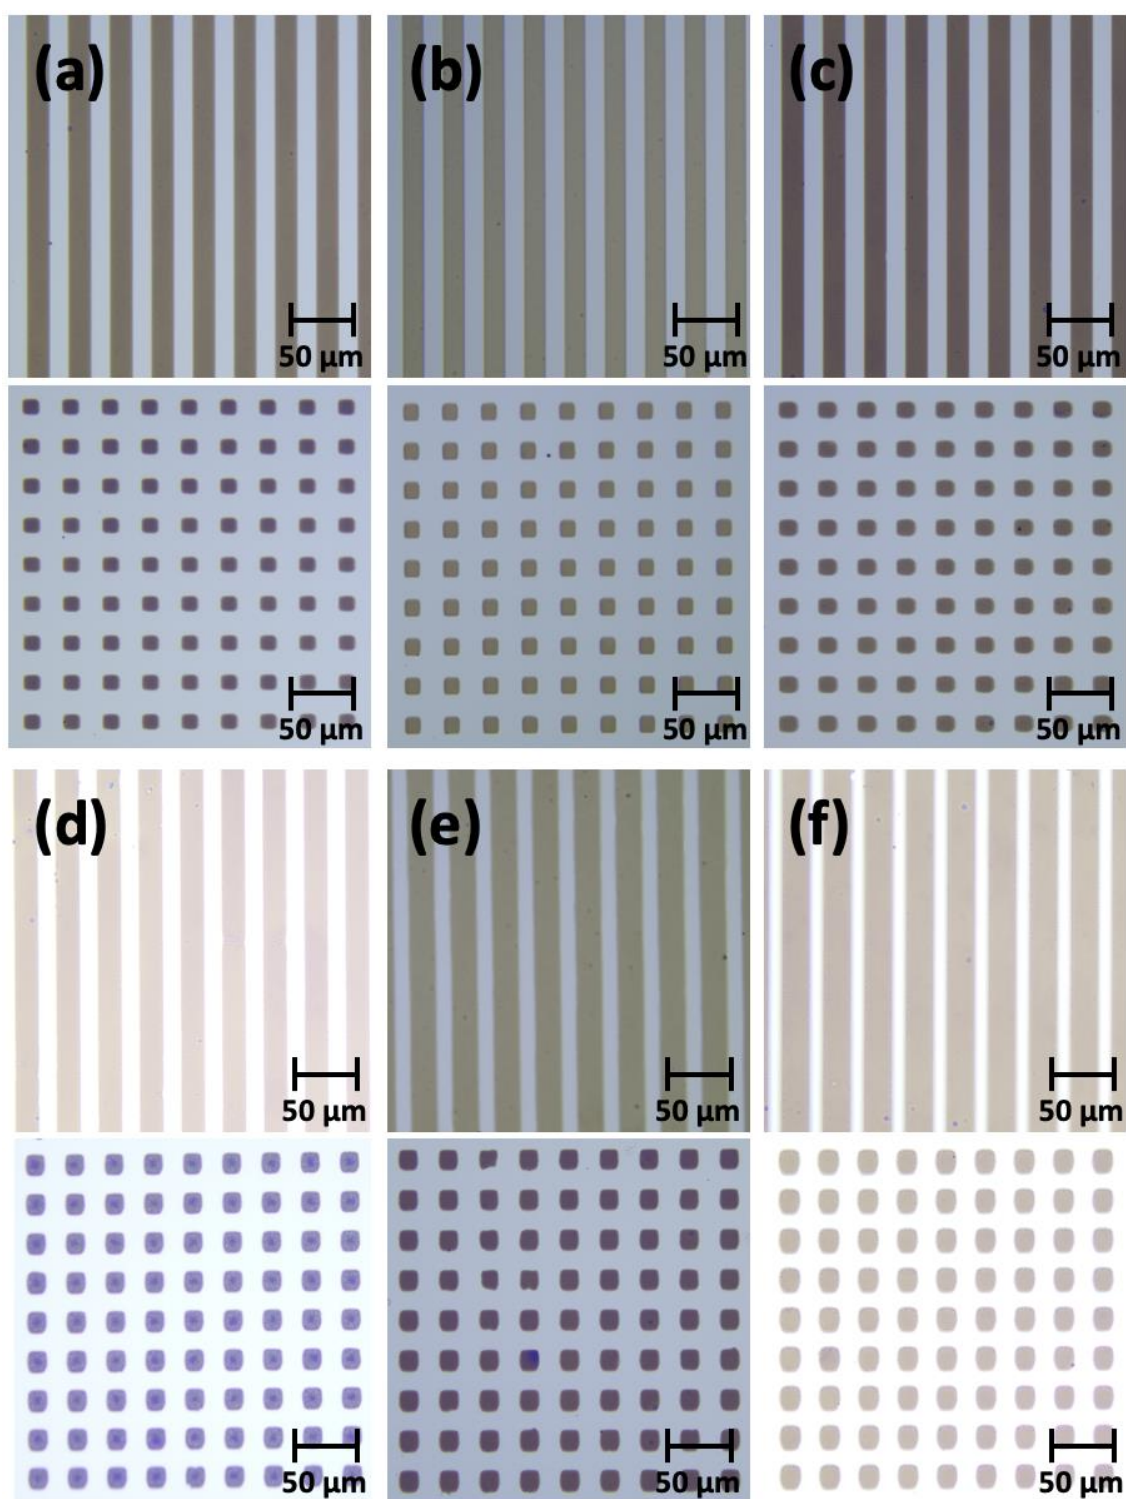

**Figure S5.** Optical micrographs showing line/space and square patterns fabricated with (a) MGN2, (b) MGN3, (c) MGN4, (d) MDN2, (e) MDN3, and (f) MDN4 copolymers (scale bar = 50  $\mu\text{m}$ ).

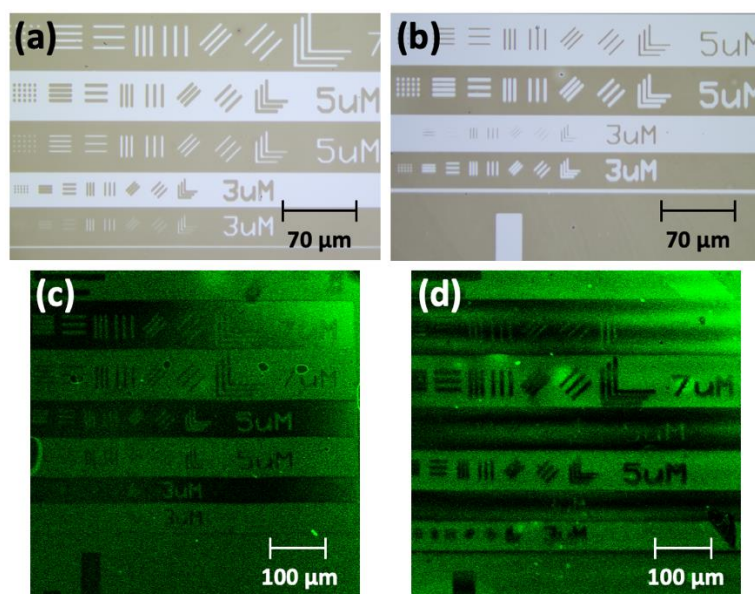

**Figure S6.** Optical micrographs of the photopatterns fabricated with (a) MDN3 and (b) MGN3, and fluorescence micrographs of FITC-labelled photopatterns of (c) MDN3 and (d) MGN3.

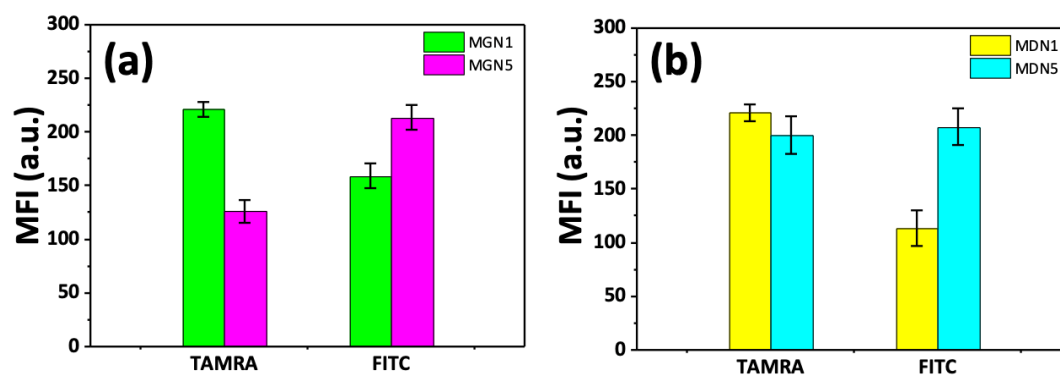

**Figure S7.** Mean fluorescence intensity (MFI) measured from TAMRA- and FITC-incorporated photopatterns fabricated with (a) MGN1 and MGN5, and (b) MDN1 and MDN5 copolymers.



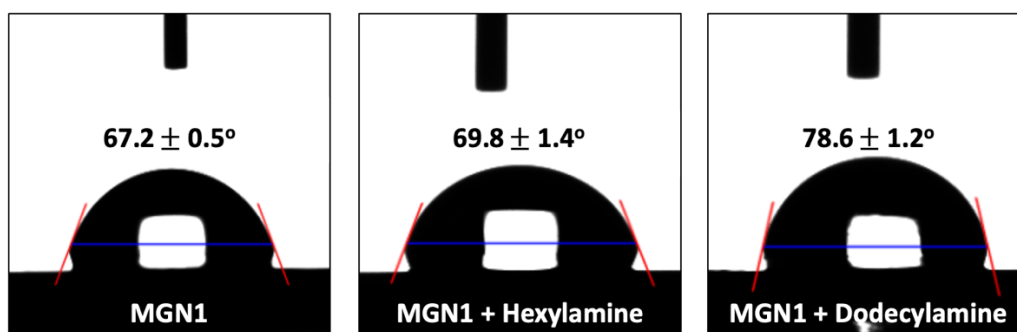

**Figure S8.** Optical images showing water sessile drops on the surfaces of unmodified, hexylamine-, and dodecylamine-immobilized MGN1 thin films.

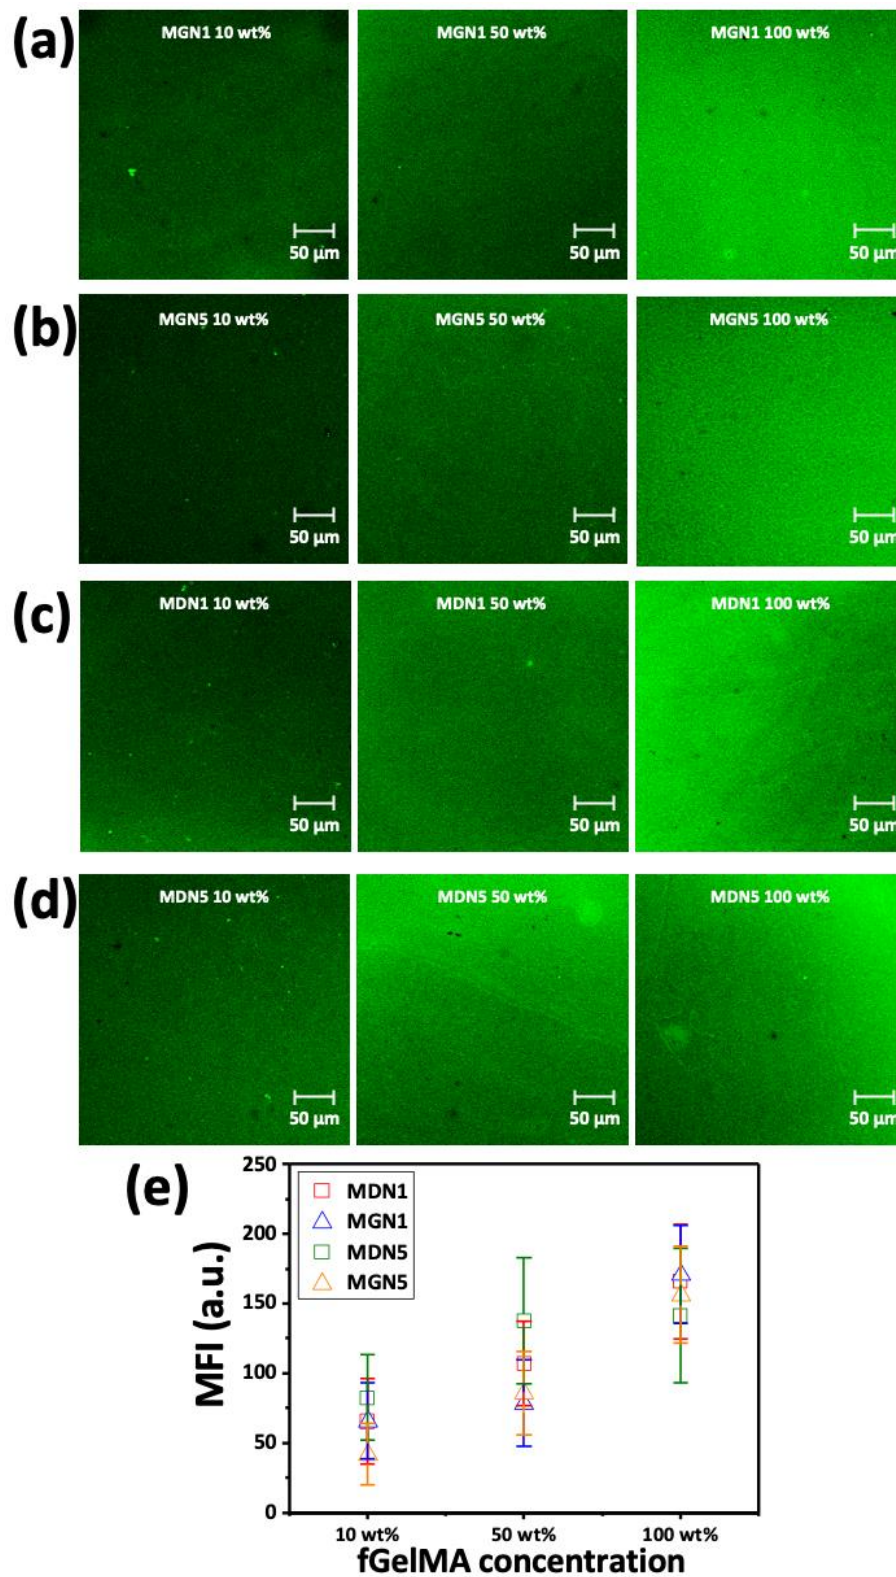

**Figure S9.** CLSM images showing the fluorescence signal of FITC from FITC-labelled (a) fGelMA/MGN1, (b) fGelMA/MGN5, (c) fGelMA/MDN1, (d) fGelMA/MDN5, and (e) MFI values estimated from the images of Figure S9a-S9d.
